# Supplementary material for: Versatile RBC-derived vesicles as nanoparticle vector of photosensitizers for photodynamic therapy
Source: Royal Society of Chemistry journal article supplement (doi:10.1039/c2nr32506c), 2012-11-13
Supplement: c2nr32506c.pdf [file c2nr32506c.pdf]

## Versatile RBC-derived vesicles as nanoparticle vector of photosensitizers for photodynamic therapy

Leng-Yin Wang, Xuan-Yu Shi, Chung-Shi Yang, and Dong-Ming Huang

Center for Nanomedicine Research, National Health Research Institutes, Miaoli, Taiwan

### Detection of singlet oxygen

We used 1,3-diphenylisobenzofuran (DPBF, Aldrich) to determine the release of singlet oxygen into solution<sup>1</sup> to indirectly estimate the oxygen inside RDVs. The reaction was monitored by recording the decrease in absorption at 400 nm via UV-Vis spectroscopy (DU800, Beckman). In our experiment, 1.25  $\mu\text{L}$  of stock solution of DPBF (8 mM) was added into 200  $\mu\text{L}$  of 0.5  $\mu\text{g } \mu\text{L}^{-1}$  PpIX@RDVs (Fig. S1a), HbO<sub>2</sub>-containing PpIX@RDVs (Fig. S1b) or HbCO-containing PpIX@RDVs (Fig. S1c) at 0 or 24 h after the preparation of various RDVs in D<sub>2</sub>O. Solutions were then illuminated with a 635 laser and the optical densities at 408 nm recorded every 20 s for total 120 s. The steep decrease of DPBF absorption with time in the PpIX@RDVs solution or HbO<sub>2</sub>-containing PpIX@RDVs solution but not in the HbCO-containing PpIX@RDVs solution indicates the efficient generation of <sup>1</sup>O<sub>2</sub> by PpIX@RDVs and HbO<sub>2</sub>-containing PpIX@RDVs but not by HbCO-containing PpIX@RDVs (Fig. S1d). Although the efficiency of <sup>1</sup>O<sub>2</sub> generation in the PpIX@RDVs or HbO<sub>2</sub>-containing PpIX@RDVs solution was less than that at 0 h, PpIX@RDVs and HbO<sub>2</sub>-containing PpIX@RDVs still showed good performance of <sup>1</sup>O<sub>2</sub> generation at 24 h after their preparation. These results show that the oxygen molecules could be maintained inside RDVs for a long period of time.

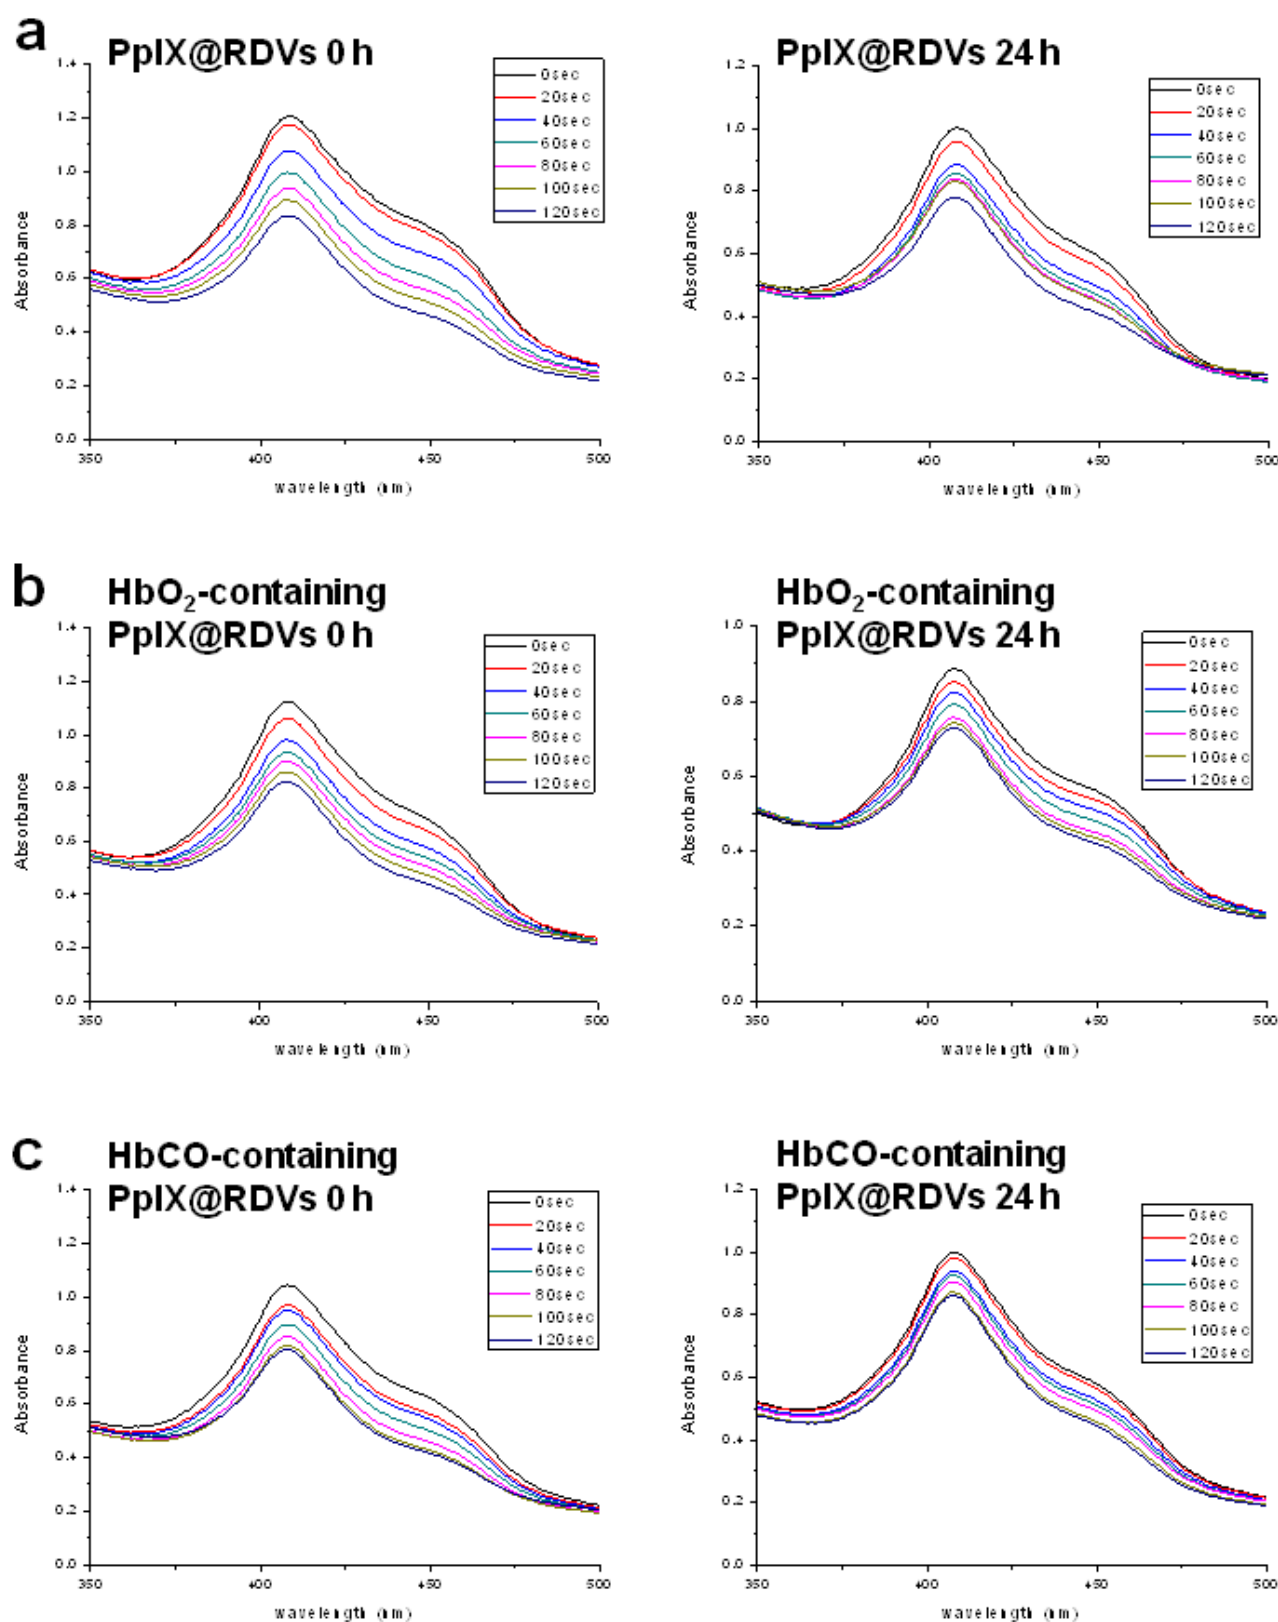

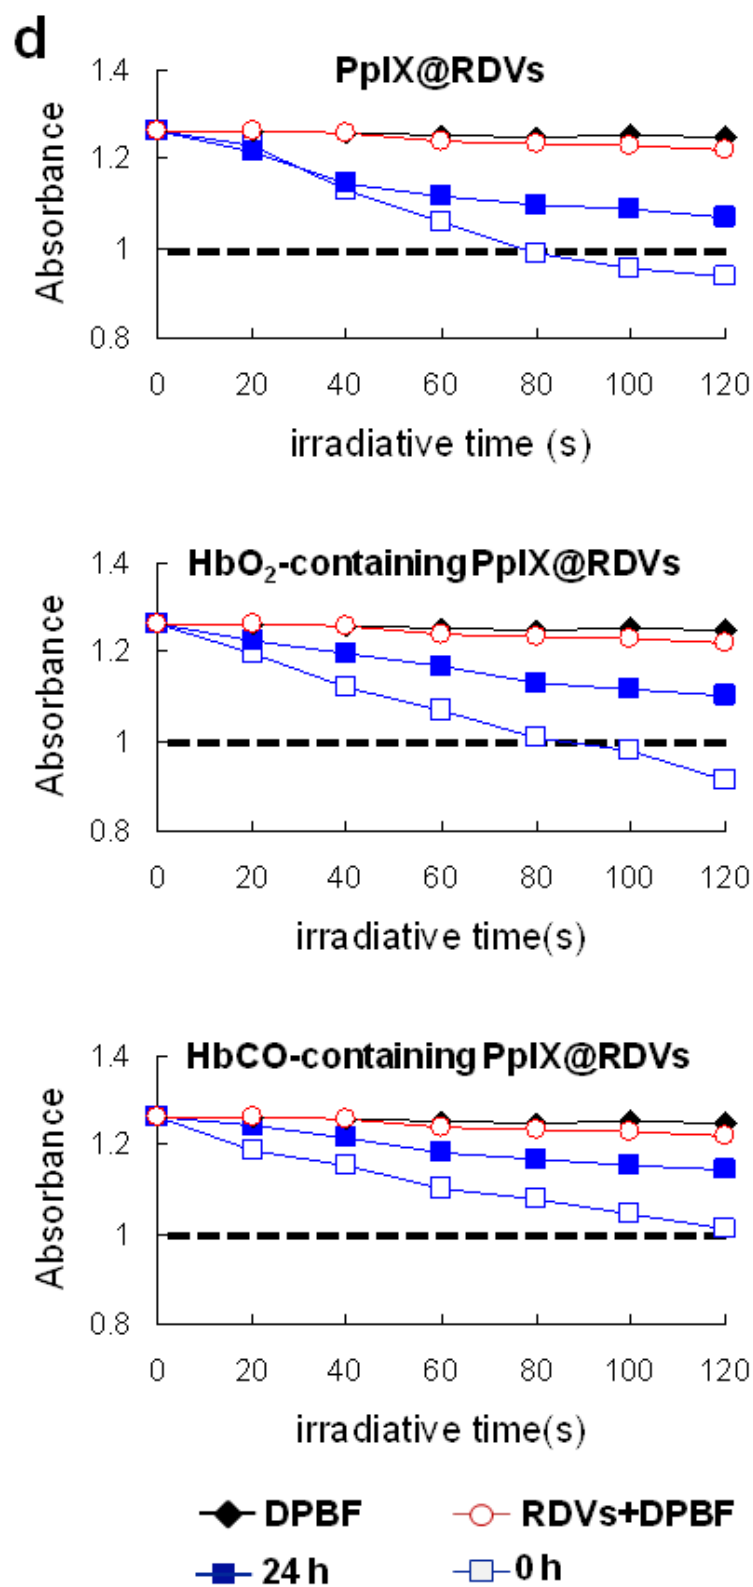

**Fig. S1** Photobleaching of DPBF by singlet oxygen generated from PpIX@RDVs (a), HbO<sub>2</sub>-containing PpIX@RDVs (b), or HbCO-containing PpIX@RDVs (c) upon photoirradiation at 635 nm. (d) Decay curves of DPBF absorption as function of irradiative time from (a) to (c).

### Induction of cellular hypoxia by DFO

Huh7 cells ( $5 \times 10^3$  cells) were seeded in a 96-well plate and allowed to attach for 24 h. These cells were treated with desferrioxamine (DFO) at 0 (Control), 10, 30, 100, 300, and 1000  $\mu\text{M}$  for 24 h and then were processed for MTT reduction assay. We found that DFO would cause a minor cytotoxicity when the treatment concentration was higher than 100  $\mu\text{M}$  (Fig. S2a), and therefore DFO at 30  $\mu\text{M}$  was chosen to induce cellular hypoxia.

Huh7 cells were seeded in 35-mm dishes ( $1 \times 10^5$  cells per dish) overnight and then were treated with 30  $\mu\text{M}$  DFO for 24 h. After treatment cells were rinsed with ice-cold  $1 \times \text{PBS}$  and were lysed by the addition of lysis buffer (25 mM HEPES, pH 7.5, 150 mM NaCl, 1% Igepal CA-630, 10 mM MgCl<sub>2</sub>, 1 mM EDTA and 2% glycerol, 1  $\mu\text{M}$  phenylmethylsulfonyl fluoride, 1  $\mu\text{g mL}^{-1}$  leupeptin, and 10  $\mu\text{g mL}^{-1}$  aprotinin) for 60 min at 4°C. The suspensions were centrifuged at 15700 g for 20 min at 4°C. The protein concentration of the supernatant was assessed by the Bio-Rad protein assay kit. The cellular content of HIF1 $\alpha$  was determined by commercially available enzyme-linked immunosorbent assay kit (ELISA; Abcam, ab117996). A dramatic induction of HIF1 $\alpha$  content in DFO-treated cells suggests a cellular hypoxia (Fig. S2b).

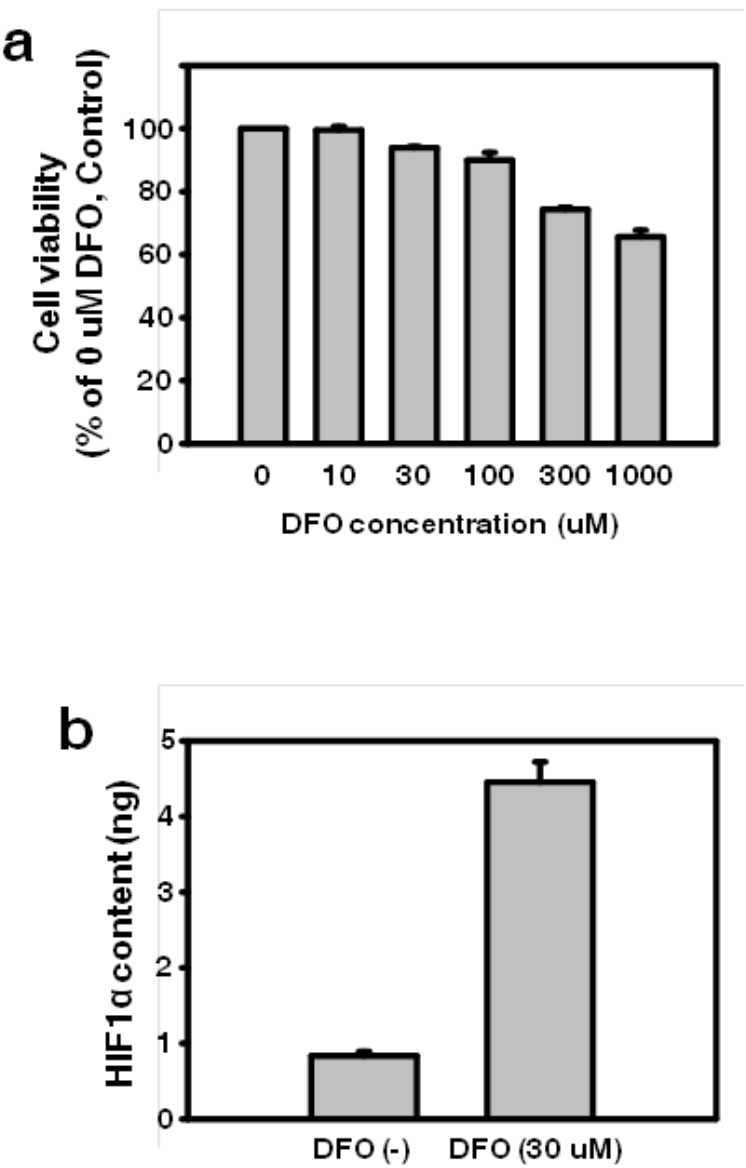

**Fig. S2** Induction of hypoxia by DFO in Huh7 cells. (a) The cytotoxic effects of various concentrations of DFO. Data are expressed as mean  $\pm$  standard error of three determinations (each in quadruplicate). (b) The induction of cellular hypoxia was demonstrated by the increase of HIF1 $\alpha$  content. Values represent mean  $\pm$  standard error of four experiments.

### Stability of RDVs

10  $\mu$ L RDVs ( $0.1 \mu\text{g } \mu\text{L}^{-1}$ ) were incubated in 990  $\mu$ L Dulbecco's phosphate buffered saline (DPBS) containing with (blood/DPBS) or without (DPBS) 90  $\mu$ L whole blood at 4°C for 1, 24 or 72 h. Then the samples were processed for the TEM observation and the particle size and zeta potential measurement. After a long incubation of RDVs, RDVs could be recovered without deformation or aggregation by TEM observation (Fig. S3). The zeta potential assay also suggests the high stability of RDVs (Table S1).

**a** RDVs in DPBS for 1 h

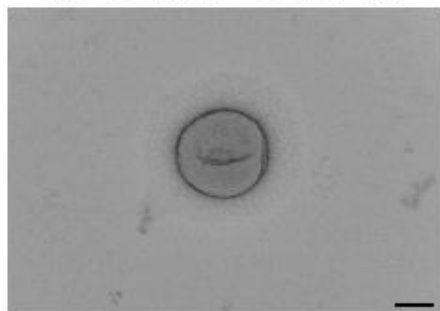

**d** RDVs in blood/DPBS for 1 h

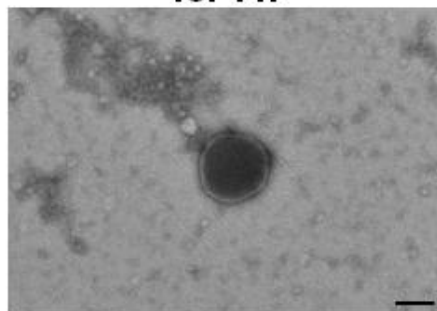

**b** RDVs in DPBS for 24 h

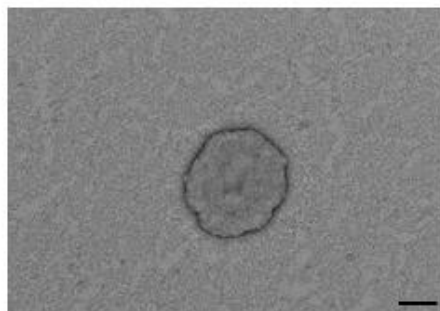

**e** RDVs in blood/DPBS for 24 h

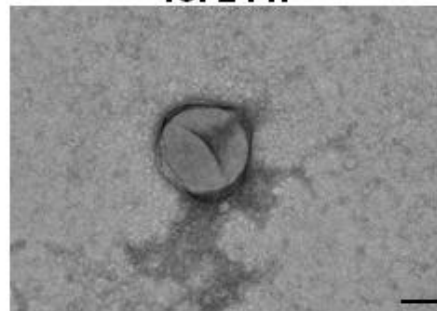

**c** RDVs in DPBS for 72 h

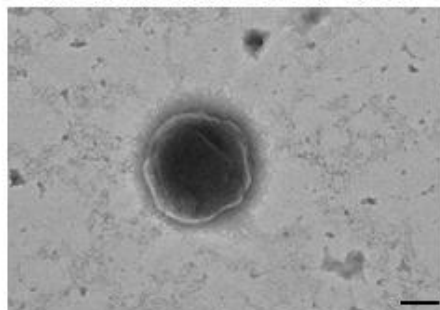

**f** RDVs in blood/DPBS for 72 h

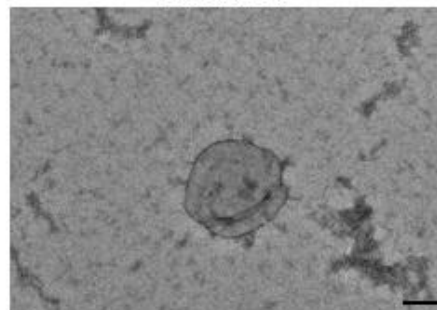

**Fig. S3** TEM observation of RDVs after the incubation in DPBS for 1 h (a), 24 h (b), and 72 h (c) or in blood/DPBS for 1 h (d), 24 h (e), and 72 h (f). Scale bar, 100 nm.

**Table S1.** The particle sizes and zeta potentials of RDVs after their incubation in DPBS or blood/DPBS.

| Incubation time\Buffer | DPBS             | Blood/DPBS       |
|------------------------|------------------|------------------|
| 1 h                    | 266.7 ± 5.6 nm   | 260.6 ± 6.2 nm   |
|                        | -10.52 ± 0.63 mV | -10.52 ± 1.39 mV |
| 24 h                   | 269.2 ± 4.0 nm   | 255.1 ± 6.7 nm   |
|                        | -10.33 ± 0.38 mV | -11.33 ± 0.47 mV |
| 72 h                   | 278.6 ± 7.8 nm   | 271.4 ± 10.2 nm  |
|                        | -11.13 ± 0.42 mV | -11.77 ± 0.21 mV |

**References**

(1) D. B. Tada, L. L. Vono, E. L. Duarte, P. K. Itri, M. S. Baptista and L. M. Rossi, *Langmuir*, 2007, **23**, 8194–8199.
